# Supplementary material for: MCAT Mutations Cause Nuclear LHON-like Optic Neuropathy
Source: PubMed Central journal article supplement (PMC8067165; doi:10.3390/genes12040521), 2021-04-02
Supplement: genes-12-00521-s001.pdf [file genes-12-00521-s001.pdf]

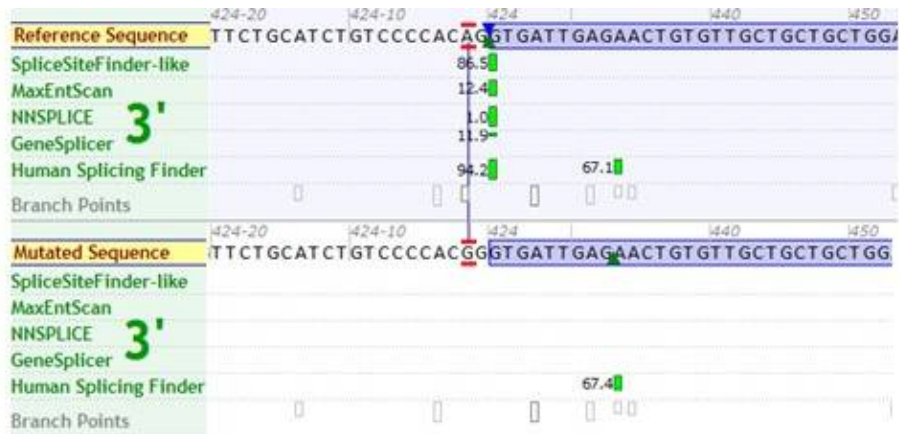

**Supplementary Figure 1.** *MCAT* intron 1 / exon 2 region encompassing pathological c.424-2A>G variant, and splicing score predictions. The consensus splice site predicted in the wildtype sequence (reference sequence) is lost in the sequence harbouring the c.424-2A>G change (Mutated sequence), according to the five prediction programs available through the Alamut software. This is predicted to result in the skipping of exon 2.

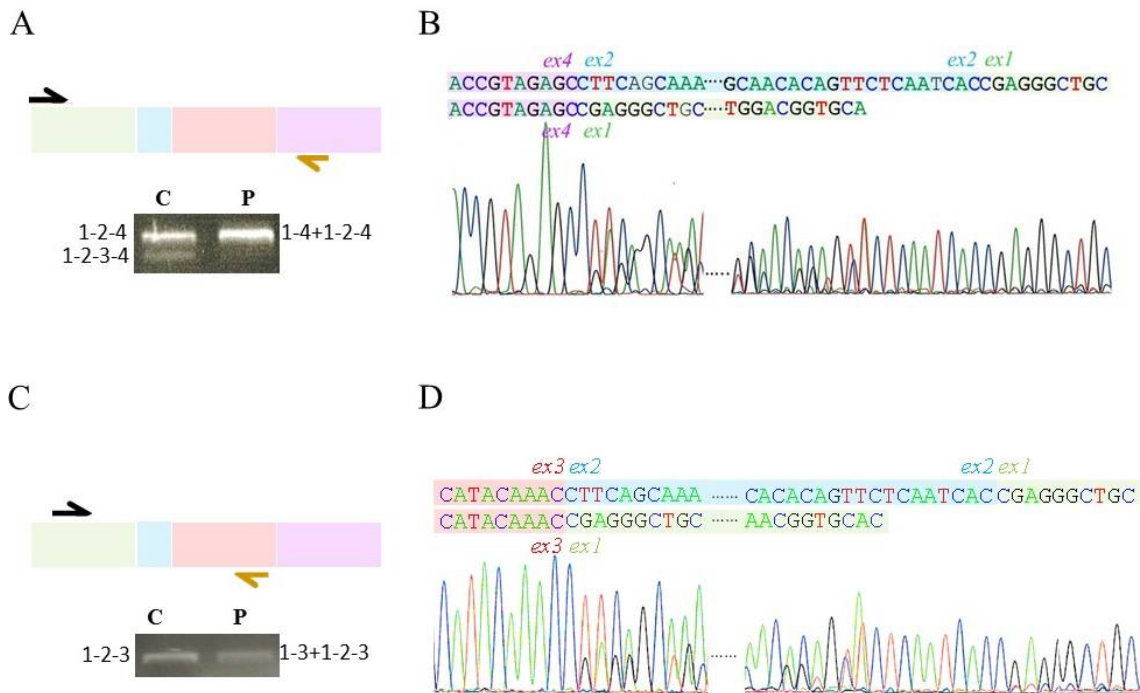

**Supplementary Figure 2.** RT-PCR and Sanger sequencing analysis of leukocyte mRNA from control and index case II-1. Simplified representations of four *MCAT* exons (green = exon 1; blue = exon 2; red = exon 3; purple = exon 4) and agarose gel images showing cDNA products amplified using forward and reverse primers (arrows) in (a) exons 1 and 4 and (c) exon 1 and 3 (C = control; P = case II-1). Exonic composition of cDNA products amplified from II-1 leukocytes was determined by Sanger sequencing using reverse primers (see gold arrows in left panels) in (b) exon 4 and (d) exon 3. Sequence electropherograms obtained from control cells are not shown.

p.E347K

|                         |   |   |   |   |   |   |   |   |   |   |   |
|-------------------------|---|---|---|---|---|---|---|---|---|---|---|
| Homo Sapiens            | F | P | Q | T | F | E | V | G | P | G | R |
| Rattus norvegicus       | F | P | S | T | F | E | V | G | P | G | Q |
| Mus musculus            | F | P | S | T | Y | E | V | G | P | G | Q |
| Canis familiaris        | F | P | K | T | F | E | V | G | P | G | K |
| Gallus gallus           | F | P | Y | T | Y | E | V | G | P | G | K |
| Xenopus tropicalis      | F | P | R | T | F | E | A | G | P | G | K |
| Tetraodon nigroviridis  | F | P | Y | T | Y | E | V | G | P | G | K |
| Drosophila melanogaster | F | P | R | T | F | E | C | G | P | G | K |
| Caenorhabditis elegans  | F | P | R | F | Y | E | V | G | A | G | R |
| Escherechia coli        | A | T | D | F | T | E | C | G | P | G | A |

**Supplementary Figure 3.** Alignment of MCAT sequence showing strict conservation of glutamic acid 347 across species, from human to bacteria. Numbering of residues refers to NM\_173467.4.
